# Supplementary material for: CD84 Links T Cell and Platelet Activity in Cerebral Thrombo-Inflammation in Acute Stroke
Source: PubMed Central journal article supplement — Circ Res. 2020 Jul 30;127(8):1023–35. doi: 10.1161/CIRCRESAHA.120.316655 (PMC7508294; doi:10.1161/circresaha.120.316655), 2020-07-30
Supplement: res-127-1023-s002.pdf [file res-127-1023-s002.pdf]

## SUPPLEMENTAL MATERIAL

### CD84 links T cell and platelet activity in cerebral thrombo-inflammation in acute stroke

Short title: CD84 in ischemic stroke

Michael K. Schuhmann<sup>1</sup>, Guido Stoll<sup>1</sup>, Michael Bieber<sup>1</sup>, Timo Vögtle<sup>2,3</sup>, Sebastian Hofmann<sup>2,3</sup>, Vanessa Klaus<sup>2</sup>, Peter Kraft<sup>1,4</sup>, Mert Seyhan<sup>5,†</sup>, Alexander M. Kollikowski<sup>6</sup>, Lena Papp<sup>1</sup>, Peter Heuschmann<sup>5,7,8,†</sup>, Mirko Pham<sup>6</sup>, Bernhard Nieswandt<sup>2,3</sup>, David Stegner<sup>2,3, #</sup>

From the <sup>1</sup>Department of Neurology, University Hospital Würzburg, Würzburg, Germany; <sup>2</sup>Institute of Experimental Biomedicine, Department I, University Hospital Würzburg, Würzburg, Germany; <sup>3</sup>Rudolf Virchow Center for Experimental Biomedicine, University of Würzburg, Würzburg, Germany; <sup>4</sup>Department of Neurology, Klinikum Main-Spessart, Lohr, Germany; <sup>5</sup>Institute of Clinical Epidemiology and Biometry, University of Würzburg, Würzburg, Germany; <sup>6</sup>Department of Neuroradiology, University Hospital Würzburg, Würzburg, Germany; <sup>7</sup>Comprehensive Heart Failure Center, University of Würzburg, Würzburg, Germany; <sup>8</sup>Clinical Trial Center, University Hospital Würzburg, Würzburg, Germany

† on behalf of the SICFAIL study group

#### Correspondence:

David Stegner, PhD

Institute of Experimental Biomedicine, Department I, University Hospital Würzburg, and Rudolf Virchow Center for Experimental Biomedicine, University of Würzburg, Würzburg, Germany

Phone: +49-931-31-80419; Fax: +49-931-31-804190

E-mail: stegner@virchow.uni-wuerzburg.de

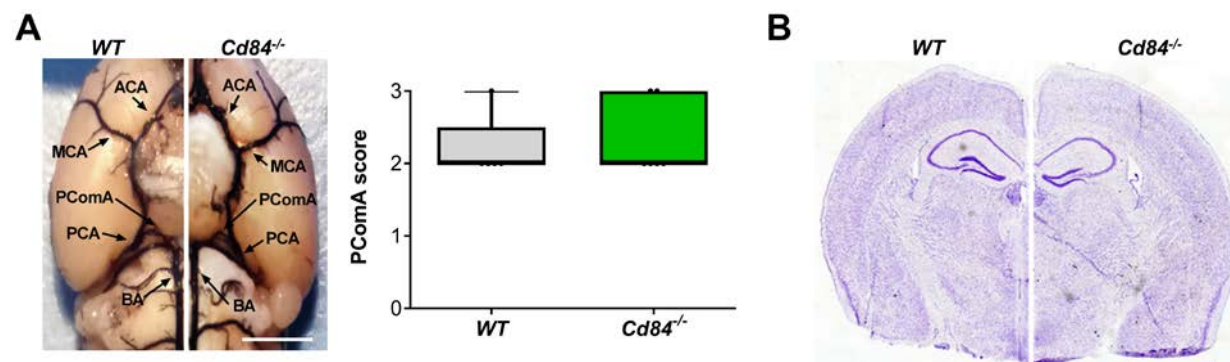

**Online Figure I. Unaltered brain morphology in CD84-deficient mice.** (A) Representative ink-stained brains of WT (n = 5) and Cd84<sup>-/-</sup> mice (n = 6) and corresponding PComA (posterior communicating artery) scores are presented as median (p > 0.99 using Mann Whitney test). (B) Nissl staining of brain slices from WT and Cd84<sup>-/-</sup> mice. Scale bar 0.25 cm.

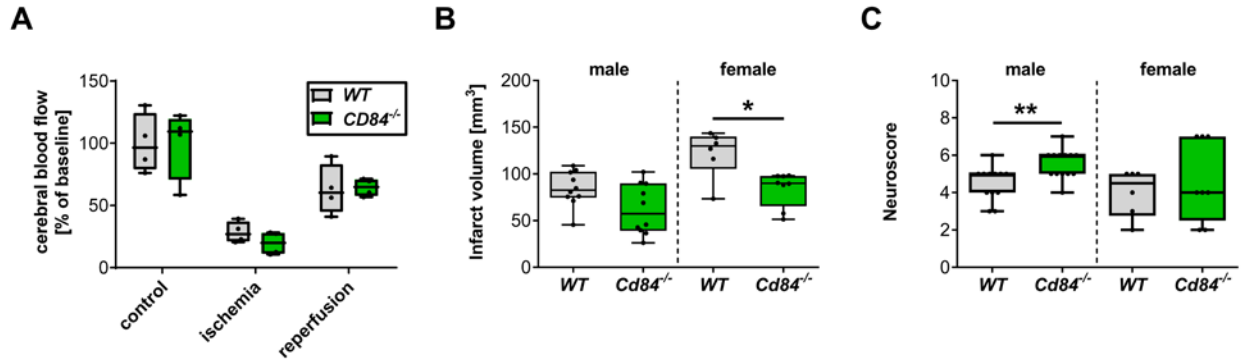

**Online Figure II. Regional cerebral blood flow is not affected by CD84-deficiency, while infarct sizes following tMCAO are smaller in CD84-deficient male and female mice.** (A) Regional cerebral blood flow (CBF) was measured with a Laser Doppler in WT and *Cd84*<sup>-/-</sup> mice (n = 4 per group) before (control), during tMCAO (ischemia) and directly after removal of the filament (reperfusion). (B) Sex-specific infarct volumes 24 h after tMCAO of WT (n = 10 male and 6 female mice) and *Cd84*<sup>-/-</sup> mice (n = 10 male and 8 female mice; p = 0.020 for the comparison of female mice). (C) Neuroscore of WT (n = 12 male and 6 female mice) and *Cd84*<sup>-/-</sup> mice (n = 13 male and 8 female mice; p = 0.0067 for the comparison of male mice) at 24 h after tMCAO. Statistical significances were determined using the Holm-Sidak correction on p-values obtained by Mann-Whitney tests. \**P*<0.05 and \*\**P*<0.01.

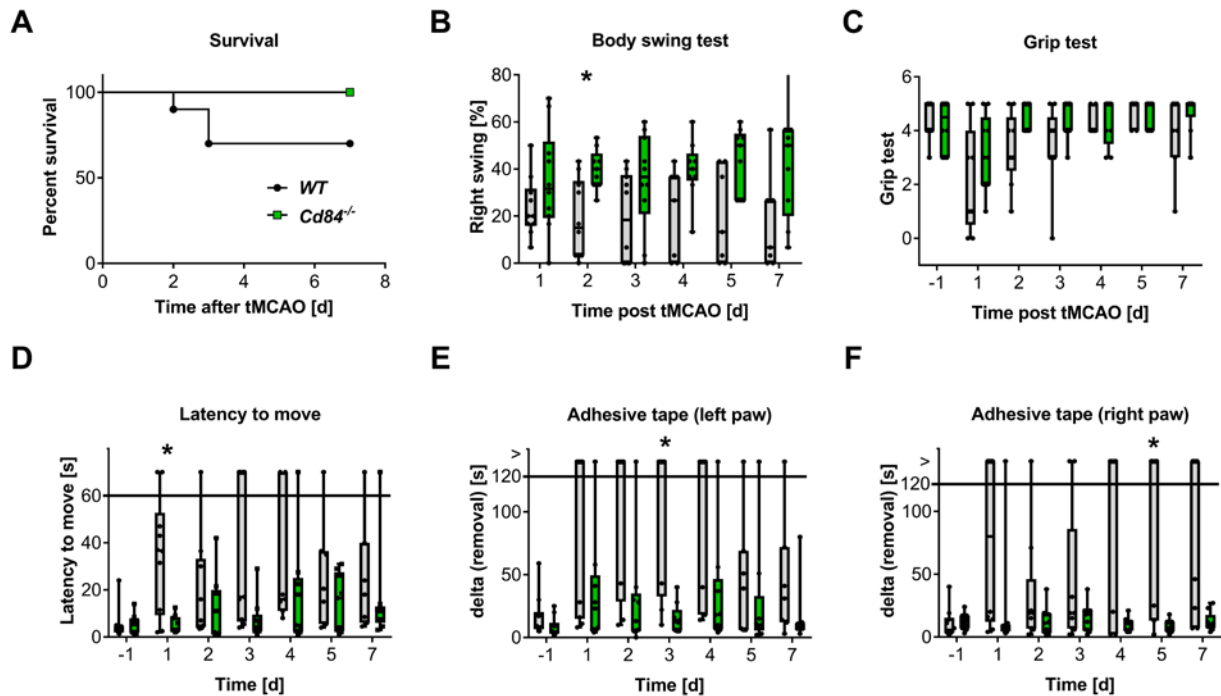

**Online Figure III. Role of CD84 in long-term functional outcome following stroke.** (A) WT and *Cd84*<sup>-/-</sup> survival is depicted as Kaplan-Meier curve (n = 9-10 mice per group). (B-F) Neurological outcome over time in WT (gray boxes) and *Cd84*<sup>-/-</sup> mice (green boxes) as assessed by body swing (B), grip test (C), latency to move (D) and adhesive tape removal (E,F) after 30 min tMCAO (n = 7-10 mice per group). Statistical significances were determined using the Holm-Sidak correction obtained by Mann-Whitney tests. \**P*<0.05; exact n numbers and p-values are listed in Online Table V.

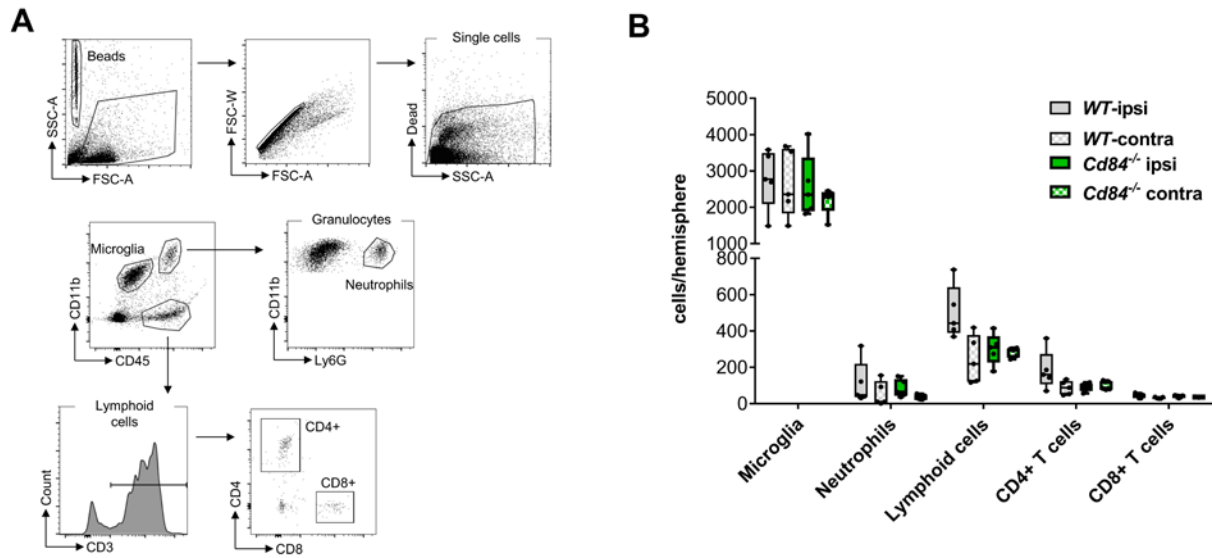

**Online Figure IV. Immune cell recruitment to the brain on day 1 following 60 min tMCAO.** Immune cell infiltration into the brain of *WT* and *Cd84<sup>-/-</sup>* mice was analyzed by flow cytometry. **(A)** Gating strategy for the flow cytometric analysis of immune cells. **(B)** Indicated immune cells per hemisphere (ipsi = ipsilateral, contra = contralateral hemisphere) 24 h after tMCAO of *WT* and *Cd84<sup>-/-</sup>* mice (n = 5 mice per group; no statistical significant differences were observed based on 2-way ANOVA).

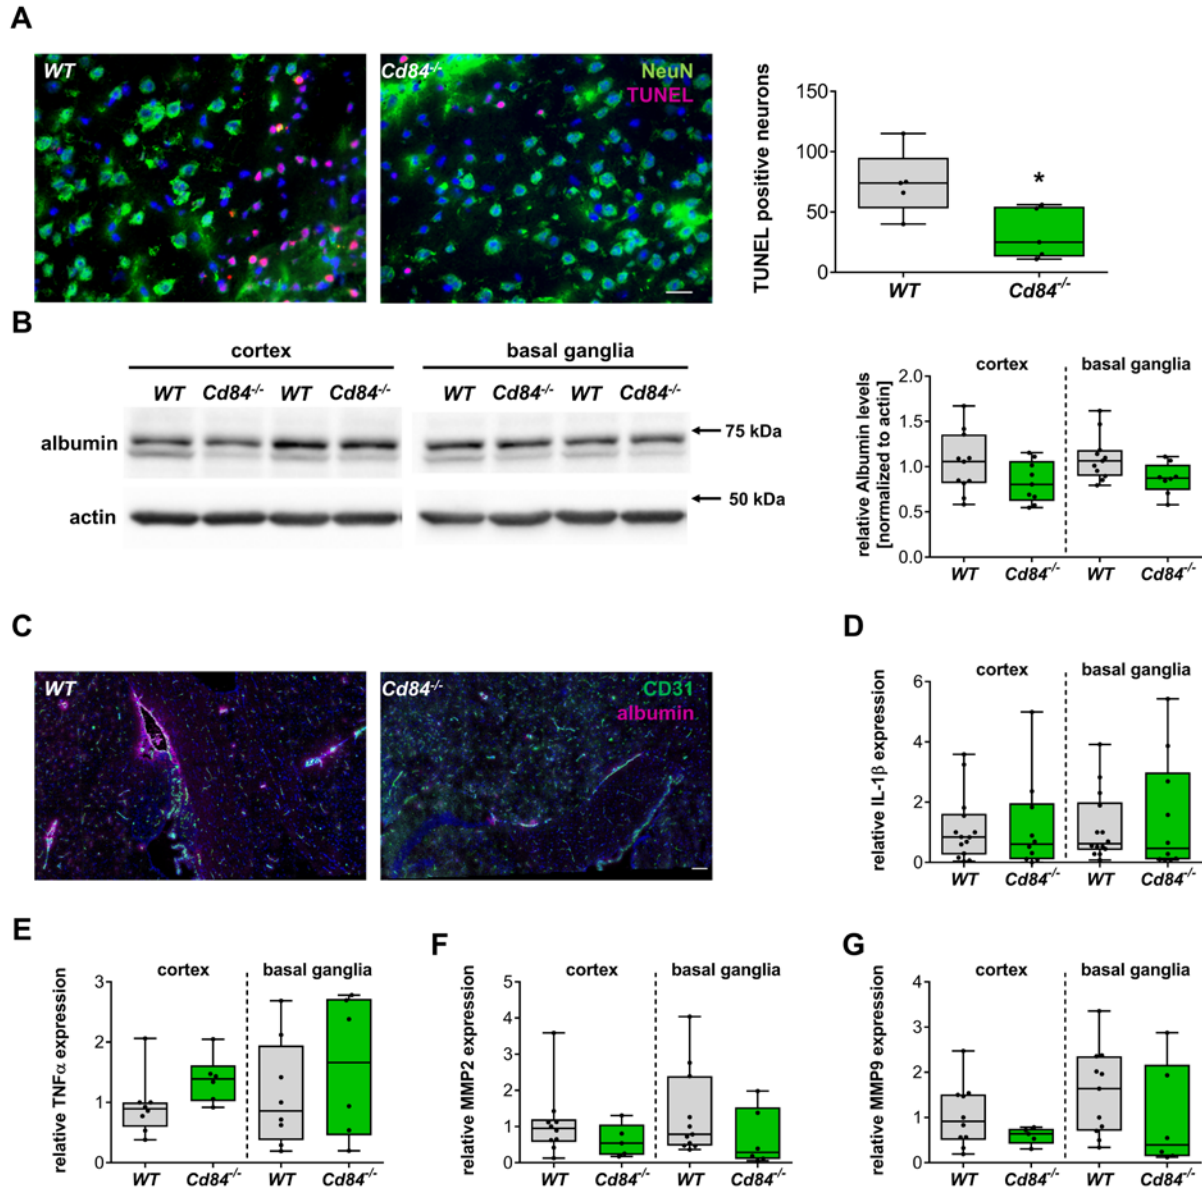

**Online Figure V. Diminished neuronal apoptosis and blood brain barrier damage at day 1 after stroke in CD84-deficient mice.** (A) Representative brain sections from a *WT* and a *Cd84*<sup>-/-</sup> mouse stained for the neuronal marker NeuN (green) and subjected to TUNEL assay (magenta) to visualize apoptosis. Quantification of dead neurons per optical field in the ischemic penumbra ( $n = 5$  mice per group;  $p = 0.0317$ ). Scale bar 25  $\mu\text{m}$ . (B) Representative anti-albumin Western blot analysis and densitometric quantification of ipsilesional albumin protein levels in the basal ganglia ( $n = 11$  for *WT* and  $n = 8$  for *Cd84*<sup>-/-</sup> mice) as well as cortical regions ( $n = 11$  for *WT* and  $n = 9$  for *Cd84*<sup>-/-</sup> mice) after tMCAO. (C) Representative brain sections from a *WT* and a *Cd84*<sup>-/-</sup> mouse stained for vessels (anti-CD31, green) and albumin (magenta) to visualize leakage as indicator of blood brain barrier damage. Counter-stained with DAPI (blue), scale bar 100  $\mu\text{m}$ . (D) Relative gene expression of interleukin (IL)-1 $\beta$  ( $n = 14$  for *WT* and  $n = 10$  for *Cd84*<sup>-/-</sup> mice), (E) tumor necrosis factor  $\alpha$  (TNF $\alpha$ ) ( $n = 8$  for *WT* and  $n = 6$  for *Cd84*<sup>-/-</sup> mice), (F) matrixmetalloproteinase 2 (MMP2) and (G) MMP9 in the ischemic basal ganglia ( $n = 11$  for *WT* and  $n = 6$  for *Cd84*<sup>-/-</sup> mice) and cortex ( $n = 10$  for *WT* and  $n = 5$  for *Cd84*<sup>-/-</sup> mice) at day 1 after tMCAO of *WT*

and *Cd84*<sup>-/-</sup> mice (n =5-6 mice per group). Statistical significances were analyzed by Mann-Whitney test: \**P*<0.05.

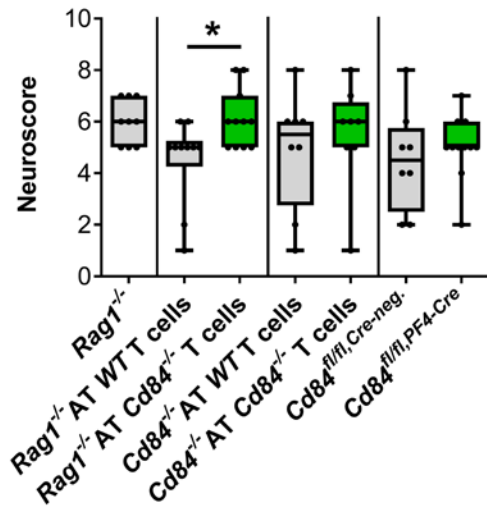

**Online Figure VI. CD84-deficiency in CD4<sup>+</sup> T cells reduces cerebral damage.** Neuroscore at day 1 after transient middle cerebral artery occlusion of *Rag1*<sup>-/-</sup> mice (n = 9), *Rag1*<sup>-/-</sup> mice with adoptive transfer of *WT* (n = 10) or *Cd84*<sup>-/-</sup> CD4<sup>+</sup> T cells (n = 11; p = 0.0225) at day 1 before surgery, *Cd84*<sup>-/-</sup> mice with adoptive transfer of *WT* (n = 8) or *Cd84*<sup>-/-</sup> CD4<sup>+</sup> T cells (n = 8) at day 1 before surgery, and mice specifically lacking the expression of CD84 on platelets (n = 11) compared to control mice (n = 8), at day 1 after tMCAO; AT = adoptive transfer. Statistical significances were analyzed by Mann-Whitney test. \**P*<0.05

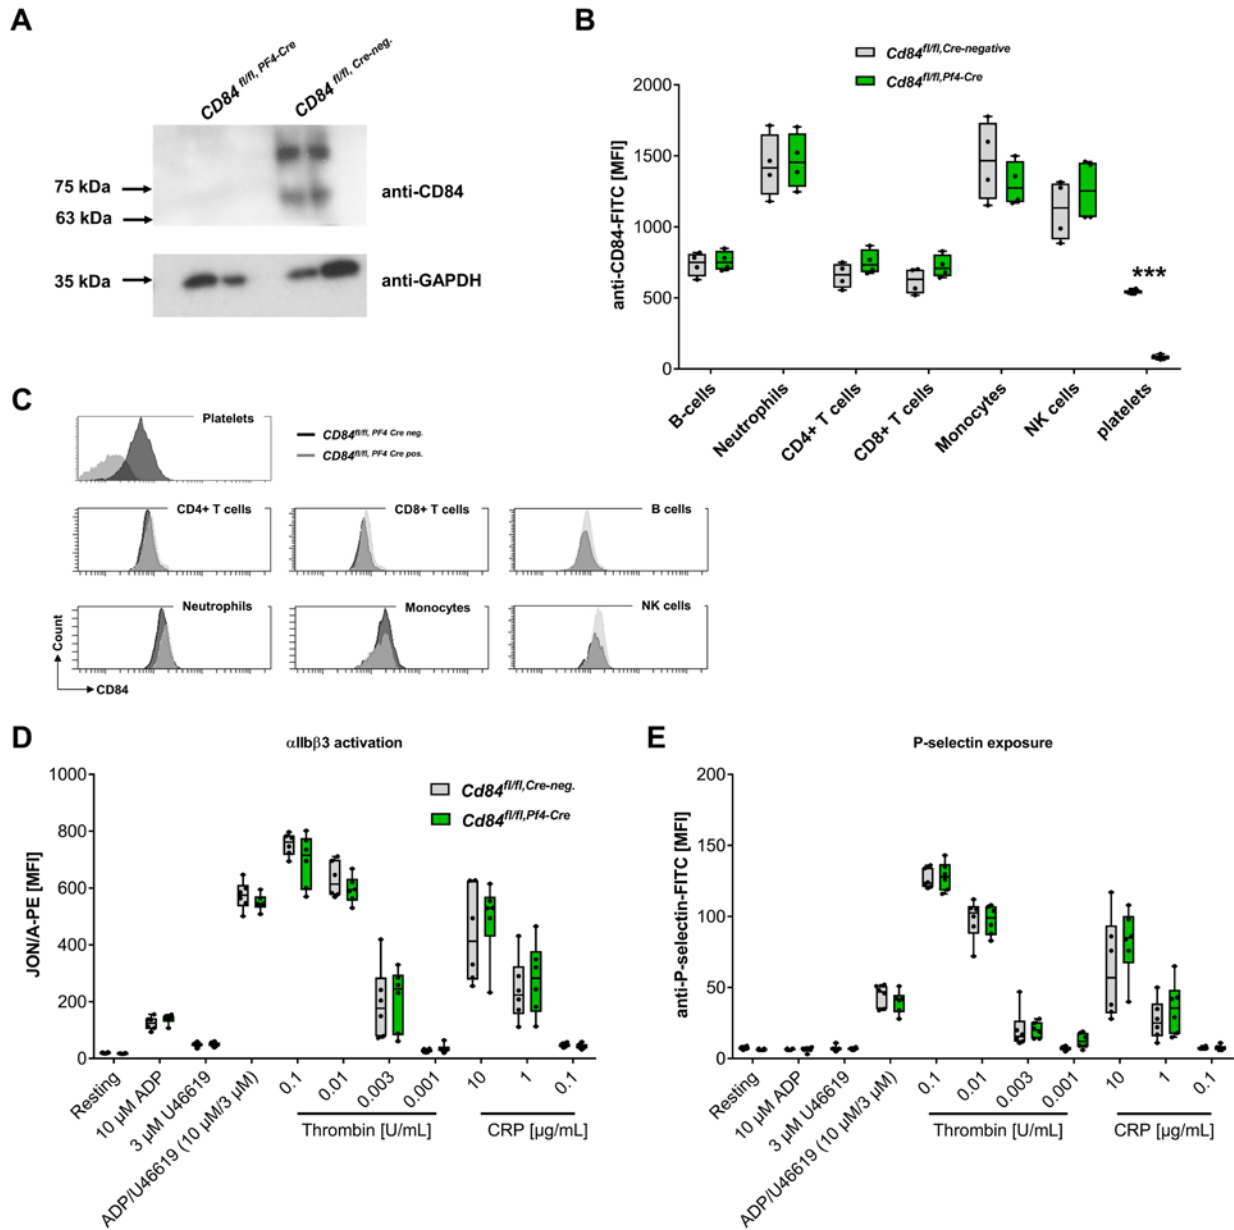

**Online Figure VII. Normal activation responses in platelets from *Cd84<sup>fl/fl</sup>, P14-Cre* mice.** (A) Analysis of CD84 expression in platelets from two wild-type (*Cd84<sup>fl/fl</sup>, Cre-neg*) and two *Cd84<sup>fl/fl</sup>, P14-Cre* mice by Western blotting. Expression of GAPDH was used as loading control. (B,C) Flow cytometric analysis of CD84 expression of blood-derived immune cells (n = 4 per group; p > 0.05) and platelets (n = 6 per group; p = 6.59 \* 10<sup>-13</sup>) from wild-type (*Cd84<sup>fl/fl</sup>, Cre-neg*) and *Cd84<sup>fl/fl</sup>, P14-Cre* mice. (B) Results are presented as mean fluorescence intensities (MFI) and each dot represents one individual. (C) Representative histograms from *Cd84<sup>fl/fl</sup>, Cre-neg* and *Cd84<sup>fl/fl</sup>, P14-Cre* derived cells. (D,E) Flow cytometric analysis of integrin  $\alpha$ IIb $\beta$ 3-activation (D) and degranulation-dependent P-selectin exposure (E) in response to the indicated agonists in wild-type and *Cd84<sup>fl/fl</sup>, P14-Cre* platelets. Results are presented as mean fluorescence intensities (MFI) and are representative of 3 individual experiments with n = 6 mice per group. Statistical significances were determined using the Holm-Sidak correction on p-values obtained by Mann-Whitney tests. \*\*\*P < 0.001; CRP: collagen-related peptide.

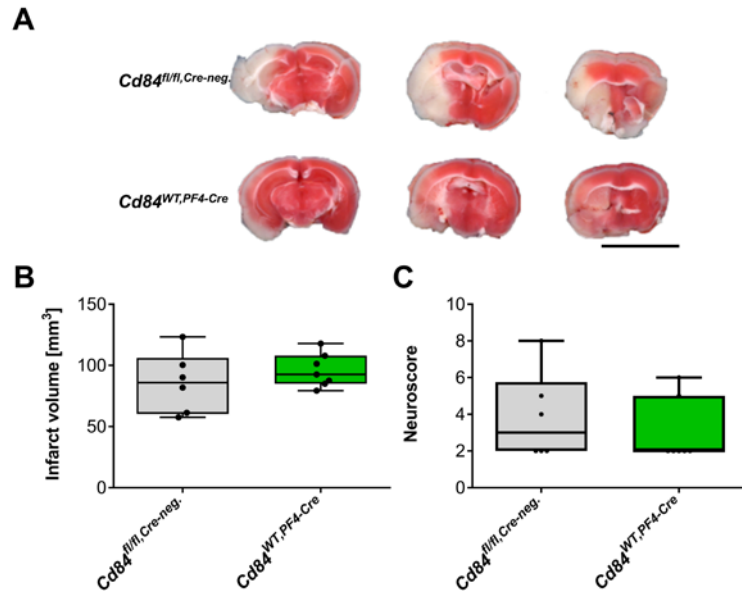

**Online Figure VIII. Infarct sizes following tMCAO are comparable between *Cd84<sup>+/+</sup>;PF4Cre<sup>+ve</sup>* and *CD84<sup>fl/fl</sup>; PF4Cre<sup>-ve</sup>* mice.** (A) Representative images of coronal sections stained with TTC 24 hours after tMCAO (60 min). Infarcted areas are shown in white; bar 1 cm. (B) Planimetric analysis was used to quantify the infarct volume of *Cd84<sup>+/+</sup>; PF4Cre<sup>+ve</sup>* and *CD84<sup>fl/fl</sup>; PF4Cre<sup>-ve</sup>* mice (n = 6-7 mice per group). (C) Neuroscore at 24 h after tMCAO (n = 6-7 mice per group). No statistical significant differences were observed using the Mann Whitney test.

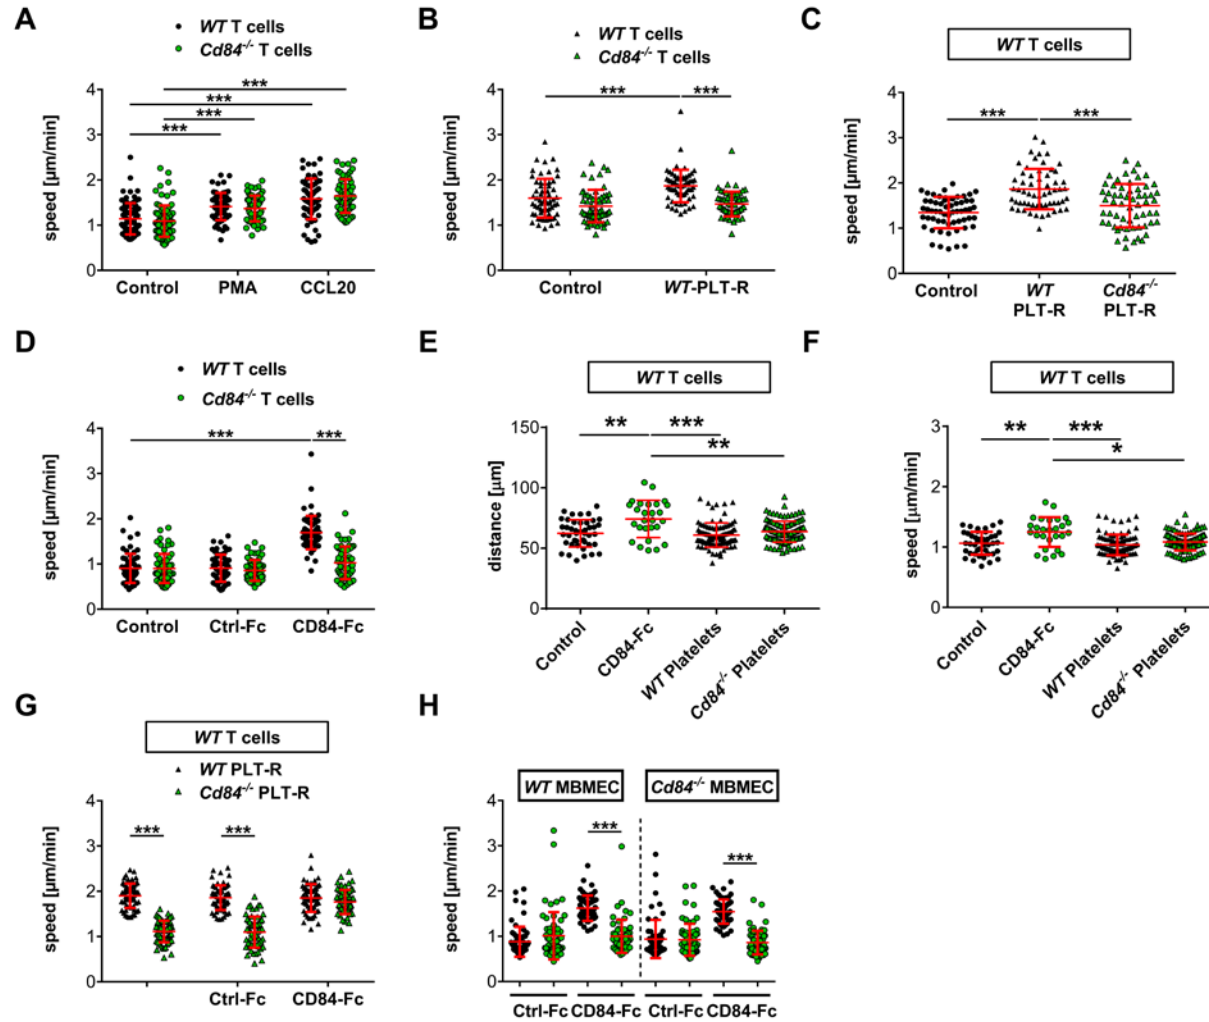

**Online Figure IX. Soluble CD84 promotes CD4<sup>+</sup> T cell migration.** (A) Velocity of CD4-positive *WT* and *Cd84*<sup>-/-</sup> CD4<sup>+</sup> T cells treated with vehicle, phorbol-12-myristate-13-acetate (PMA), or C-C motif chemokine ligand 20 (CCL20). (B) *WT* and *Cd84*<sup>-/-</sup> CD4<sup>+</sup> T cell migration speed in response to stimulation with *WT* platelet releasate (PLT-R) compared to vehicle. (C) *WT* CD4<sup>+</sup> T cell migration speed in response to stimulation with *WT* or *Cd84*<sup>-/-</sup> PLT-R compared to control. (D) Velocity of CD4-positive *WT* and *Cd84*<sup>-/-</sup> CD4<sup>+</sup> T cells treated with vehicle, recombinant control-Fc or CD84-Fc protein. (E) Migration distance and (F) speed of *WT* CD4<sup>+</sup> T cells treated with vehicle (control), recombinant CD84-Fc protein or washed *WT* and *Cd84*<sup>-/-</sup> platelets. (G) *WT* CD4<sup>+</sup> T cell migration speed in response to stimulation with *WT* or *Cd84*<sup>-/-</sup> PLT-R in the presence of Control-Fc or recombinant CD84-Fc protein. (H) Velocity of CD4-positive *WT* and *Cd84*<sup>-/-</sup> CD4<sup>+</sup> T cells treated with GPVI-Fc or CD84-Fc on primary murine brain microvascular endothelial cells (MBMEC) of *WT* or *Cd84*<sup>-/-</sup> mice. Each dot represents the velocity of one CD4<sup>+</sup> T cell over 30 min ( $n = 27-120$  cells per group of 3-4 independent experiments). Horizontal red lines correspond to the mean and standard deviation. Statistical significances analyzed by 1-way ANOVA with Bonferroni post hoc test or Kruskal-Wallis test with Dunn's multiple comparison test, the exact test,  $n$ -numbers and  $p$ -values are listed in Online Table VI; \* $P < 0.05$ ; \*\* $P < 0.01$  and \*\*\* $P < 0.001$ .



**Online Table I. Exclusion criteria and dropout rates for transient middle cerebral artery occlusion (tMCAO) experiments.**

| Experimental group                                                                   | Dropout rate | Sex (male/female) | Mortality rate |
|--------------------------------------------------------------------------------------|--------------|-------------------|----------------|
| <i>WT</i>                                                                            | 4/26         | 16/10             | 6/26           |
| <i>Cd84<sup>-/-</sup></i>                                                            | 1/24         | 14/10             | 3/24           |
| <i>Rag1<sup>-/-</sup></i>                                                            | 0/9          | 7/2               | 0/9            |
| <i>Rag1<sup>-/-</sup></i> (AT of <i>WT</i> CD4 <sup>+</sup> T cells)                 | 5/15         | 15/0              | 4/15           |
| <i>Rag1<sup>-/-</sup></i> (AT of <i>Cd84<sup>-/-</sup></i> CD4 <sup>+</sup> T cells) | 1/12         | 12/0              | 1/12           |
| <i>Cd84<sup>-/-</sup></i> (AT of <i>WT</i> CD4 <sup>+</sup> T cells)                 | 0/8          | 8/0               | 0/8            |
| <i>Cd84<sup>-/-</sup></i> (AT of <i>Cd84<sup>-/-</sup></i> CD4 <sup>+</sup> T cells) | 0/8          | 8/0               | 0/8            |
| <i>Cd84<sup>fl/fl, Cre-neg</sup></i>                                                 | 2/10         | 10/0              | 0/10           |
| <i>Cd84<sup>fl/fl, Pj4-Cre</sup></i>                                                 | 0/11         | 11/0              | 0/11           |

AT = adoptive transfer

The following conditions excluded mice from analyses: (1) death within 24 hours after MCAO, (2) subarachnoidal hemorrhage or bleeding into the brain parenchyma (as macroscopically assessed during brain sampling), (3) Bederson score = 0 (24 hours after MCAO).

Assuming a reduction of infarct volume of 30% as functionally relevant and a standard deviation of 20% to the respective mean values, a group size of 8–10 was necessary to show this effect with a power of 0.8 and a probability of a type I error of <0.05 (calculated with GraphPad StatMate 2.00).

**Online Table II. Cytokine production in CD4<sup>+</sup> T cells from naïve *Cd84*<sup>-/-</sup> and WT mice upon CD3/CD28 bead (48 h) stimulation in vitro.**

|                                    | WT mice             | <i>Cd84</i> <sup>-/-</sup> mice | <i>P</i> -value |
|------------------------------------|---------------------|---------------------------------|-----------------|
| Cytokine production (median (IQR)) | n=4                 | n=4                             |                 |
| IFN- $\gamma$                      | 22741 (12501-33926) | 18070 (9150-28245)              | 0.83            |
| IL-17                              | 358.3 (265.3-756.9) | 612.1 (519.9-1167)              | 0.17            |
| IL-10                              | 525.6 (346.9-1686)  | 607.6 (340.2-734.4)             | >0.99           |

*P*-values were calculated by Mann-Whitney test.

**Online Table III. Blood parameters and platelet glycoprotein expression of *Cd84*<sup>*fl/fl, Pfl4-Cre*</sup> mice.**

|                                                            | <i>Cd84</i> <sup><i>fl/fl, Cre-neg.</i></sup> mice | <i>Cd84</i> <sup><i>fl/fl, Pfl4-Cre</i></sup> mice | <i>P</i> -value |
|------------------------------------------------------------|----------------------------------------------------|----------------------------------------------------|-----------------|
| <i>Blood parameters (median (IQR))</i>                     | n=5                                                | n=5                                                |                 |
| Platelet count [10 <sup>3</sup> /mm <sup>3</sup> ]         | 1166 (1137-1178)                                   | 1266 (1240-1381)                                   | >0.9999         |
| Mean platelet volume [ $\mu$ m <sup>3</sup> ]              | 5.6 (5.6-5.7)                                      | 5.9 (5.7-5.9)                                      | >0.9999         |
| Hematocrit [%]                                             | 48.0 (47.9-48.0)                                   | 48.0 (46.7-48.4)                                   | >0.9999         |
| Hemoglobin [g/dl]                                          | 15.4 (15.4-15.6)                                   | 15.5 (15.1-15.5)                                   | >0.9999         |
| Red blood cell count [10 <sup>6</sup> /mm <sup>3</sup> ]   | 10.3 (10.2-10.4)                                   | 10.4 (10.0-10.4)                                   | >0.9999         |
| White blood cell count [10 <sup>3</sup> /mm <sup>3</sup> ] | 9.2 (8.8-9.8)                                      | 8.7 (8.5-8.7)                                      | >0.9999         |
| Lymphocyte count [10 <sup>3</sup> /mm <sup>3</sup> ]       | 7.4 (7.1-7.4)                                      | 6.9 (6.8-7.0)                                      | >0.9999         |
| Monocyte count [10 <sup>3</sup> /mm <sup>3</sup> ]         | 0.2 (0.2-0.3)                                      | 0.2 (0.2-0.3)                                      | >0.9999         |
| Granulocyte count [10 <sup>3</sup> /mm <sup>3</sup> ]      | 2.0 (1.6-2.1)                                      | 1.5 (1.5-1.5)                                      | >0.9999         |
| Eosinophil count [10 <sup>3</sup> /mm <sup>3</sup> ]       | 0.0 (0.0-0.0)                                      | 0.1 (0.1-0.1)                                      | >0.9999         |

| <i>Platelet glycoprotein expression (mean fluorescence intensity, median (IQR))</i> | n=6             | n=6              | <i>P-value</i> |
|-------------------------------------------------------------------------------------|-----------------|------------------|----------------|
| GPIba                                                                               | 404 (377-424)   | 421 (414-430)    | 0.9653         |
| GPVI                                                                                | 53 (52-53)      | 53 (52-55)       | 0.9145         |
| Integrin $\alpha 2$                                                                 | 53 (53-53)      | 54 (54-55)       | 0.1221         |
| CD84                                                                                | 39 (39-41)      | 8 (8-8)          | 0.0018         |
| CD9                                                                                 | 1039 (912-1093) | 1105 (1084-1132) | 0.9653         |
| GPV                                                                                 | 363 (347-371)   | 358 (347-364)    | 0.8056         |
| GPIX                                                                                | 493 (487-504)   | 513 (510-518)    | 0.9653         |
| Integrin $\alpha$ IIb $\beta$ 3                                                     | 460 (428-464)   | 449 (445-452)    | 0.9270         |
| Integrin $\beta$ 3                                                                  | 180 (175-188)   | 166 (161-170)    | 0.3502         |
| CLEC-2                                                                              | 179 (175-195)   | 205 (188-207)    | 0.9653         |
| Integrin $\alpha$ 5                                                                 | 33 (31-33)      | 30 (28-30)       | 0.8056         |

Statistical significance was determined using 2-way ANOVA with Sidak's multiple comparison test (blood parameters) and the Holm-Sidak method (glycoprotein expression), respectively.

**Online Table IV. Characterization of the SICFAIL study population (n = 98), stratified for NIHSS score at day three of hospitalization.**

|                                                            | NIHSS < 5        | NIHSS ≥ 5         | p-value† |
|------------------------------------------------------------|------------------|-------------------|----------|
|                                                            | n = 79           | n = 19            |          |
| <i>Demographics</i>                                        |                  |                   |          |
| Age, years, median (IQR)                                   | 65 (52, 74)      | 77 (71, 82)       | 0.0001   |
| Male, n (%)                                                | 52 (65.8)        | 13 (68.4)         | 0.83     |
| <i>Comorbidities</i>                                       |                  |                   |          |
| Previous Stroke or TIA, n (%)                              | 22 (31.9)        | 3 (18.8)          | 0.38     |
| Coronary Heart Disease, n (%) *                            | 10 (14.5)        | 4 (25.0)          | 0.45     |
| Hypertension, n (%)                                        | 50 (68.5)        | 11 (78.6)         | 0.54     |
| Type 2 Diabetes mellitus, n (%)                            | 13 (18.1)        | 5 (27.8)          | 0.34     |
| Atrial fibrillation, n (%)                                 | 7 (11.1)         | 4 (25.0)          | 0.22     |
| <i>Index Event</i>                                         |                  |                   |          |
| NIHSS on admission, median (IQR)                           | 3 (2-5)          | 8 (4-14)          | < 0.0001 |
| Thrombolysis, n (%)                                        | 20 (27.0)        | 7 (38.9)          | 0.32     |
| Time from symptom onset to blood draw, hours, median (IQR) | 68.1 (48.0-93.3) | 84.1 (62.3-104.9) | 0.19     |
| Anti-CD84 mean fluorescence intensity, median (IQR)        | 23.1 (21.2-25.1) | 23.6 (22.6-25.5)  | 0.23     |

\* defined as history in myocardial infarction and/or angina pectoris

NIHSS National Institute of Health Stroke Scale; MFI mean fluorescence intensity

P-values were calculated by non-parametric Mann-Whitney test for continuous variables and by Chi Square test or Fisher's exact test for categorical variables.

**Online Table V. P-values and n numbers of long-term functional outcome following stroke data (Figure 2 and Online Figure III).**

|               |                           | <b>d (post tMCAO)</b> | <b>-1</b> | <b>1</b> | <b>2</b> | <b>3</b> | <b>4</b> | <b>5</b> | <b>7</b> |
|---------------|---------------------------|-----------------------|-----------|----------|----------|----------|----------|----------|----------|
|               |                           | <b>n (WT)</b>         | 10        | 10       | 9        | 9        | 8        | 7        | 7        |
| <b>Fig.</b>   | <b>Experiment</b>         | <b>n (KO)</b>         | 10        | 9        | 9        | 9        | 9        | 9        | 9        |
| <b>2a</b>     | mNSS                      | <b>p-values</b>       | -         | 0.0111   | 0.0013   | 0.0013   | 0.0565   | 0.0111   | 0.1721   |
| <b>2b</b>     | Corner Test               | <b>p-values</b>       | -         | 0.0017   | 0.0109   | 0.0109   | 4.58E-05 | 4.75E-04 | 0.0109   |
| <b>2c</b>     | Bederson Score            | <b>p-values</b>       | -         | 0.1006   | 0.1006   | 0.0161   | 0.1006   | 0.0439   | 0.0439   |
| <b>OIII B</b> | Body Swing Test           | <b>p-values</b>       | -         | 0.1757   | 0.0180   | 0.1689   | 0.1317   | 0.0663   | 0.1317   |
| <b>OIII C</b> | Grip Test                 | <b>p-values</b>       | 0.6387    | 0.5948   | 0.2066   | 0.4404   | 0.9779   | 0.9779   | 0.5948   |
| <b>OIII D</b> | Latency to move           | <b>p-values</b>       | 0.7920    | 0.0155   | 0.7920   | 0.1022   | 0.7920   | 0.6695   | 0.7920   |
| <b>OIII E</b> | Adhesive Tape (left paw)  | <b>p-values</b>       | 0.7511    | 0.3352   | 0.1014   | 0.0053   | 0.3352   | 0.8717   | 0.6524   |
| <b>OIII F</b> | Adhesive Tape (right paw) | <b>p-values</b>       | 0.9190    | 0.3697   | 0.7572   | 0.7572   | 0.0719   | 0.0437   | 0.1317   |

Statistical significance was determined using the Holm-Sidak method.

**Online Table VI. P-values and n numbers of T cell migration assays (Figure 5 and Online Figure IX).**

| <b>Figure 4A/OIX A</b>                     |                    | <i>WT</i> (control)                                      | <i>Cd84<sup>-/-</sup></i> (control) | <i>WT</i> (PMA)              | <i>Cd84<sup>-/-</sup></i> (PMA)              | <i>WT</i> (CCL20) | <i>Cd84<sup>-/-</sup></i> (CCL20) |
|--------------------------------------------|--------------------|----------------------------------------------------------|-------------------------------------|------------------------------|----------------------------------------------|-------------------|-----------------------------------|
| n                                          |                    | 80                                                       | 80                                  | 60                           | 60                                           | 59                | 60                                |
| p-value (vs. control of same genotype)     | distance (Fig. 4A) | -                                                        | -                                   | < 0.0001                     | < 0.0001                                     | < 0.0001          | < 0.0001                          |
|                                            | speed (Fig. OIX A) | -                                                        | -                                   | 0.0001                       | < 0.0001                                     | < 0.0001          | < 0.0001                          |
| p-value (vs. <i>WT</i> with same stimulus) | distance (Fig. 4A) | -                                                        | > 0.9999                            | -                            | > 0.9999                                     | -                 | > 0.9999                          |
|                                            | speed (Fig. OIX A) | -                                                        | > 0.9999                            | -                            | > 0.9999                                     | -                 | > 0.9999                          |
| Significance assessed by                   |                    | Kruskal-Wallis test with Dunn's multiple comparison test |                                     |                              |                                              |                   |                                   |
| <b>Figure 4B/OIX B</b>                     |                    | <i>WT</i> (control)                                      | <i>Cd84<sup>-/-</sup></i> (control) | <i>WT</i> ( <i>WT</i> PLT-R) | <i>Cd84<sup>-/-</sup></i> ( <i>WT</i> PLT-R) |                   |                                   |
| n                                          |                    | 60                                                       | 60                                  | 59                           | 59                                           |                   |                                   |
| p-value (vs. control of same genotype)     | distance (Fig. 4B) | -                                                        | -                                   | < 0.0001                     | > 0.9999                                     |                   |                                   |
|                                            | speed (Fig. OIX B) | -                                                        | -                                   | 0.0002                       | > 0.9999                                     |                   |                                   |
| p-value (vs. <i>WT</i> with same stimulus) | distance (Fig. 4B) | -                                                        | > 0.9999                            | -                            | < 0.0001                                     |                   |                                   |
|                                            | speed (Fig. OIX B) | -                                                        | 0.083                               | -                            | < 0.0001                                     |                   |                                   |
| Significance assessed by                   |                    | Kruskal-Wallis test with Dunn's multiple comparison test |                                     |                              |                                              |                   |                                   |

| <b>Figure 4C/OIX C</b>                             |                       | WT T cells stimulated with:                              |                                        |                                 |                                       |                 |                                        |
|----------------------------------------------------|-----------------------|----------------------------------------------------------|----------------------------------------|---------------------------------|---------------------------------------|-----------------|----------------------------------------|
|                                                    |                       | Control                                                  | WT PLT-R                               | <i>Cd84<sup>-/-</sup></i> PLT-R |                                       |                 |                                        |
| n                                                  |                       | 60                                                       | 60                                     | 59                              |                                       |                 |                                        |
| p-value<br>(vs.<br>control of<br>same<br>genotype) | distance (Fig.<br>4C) | -                                                        | < 0.0001                               | 0.5778                          |                                       |                 |                                        |
|                                                    | speed (Fig.<br>OIX C) | -                                                        | < 0.0001                               | 0.156                           |                                       |                 |                                        |
| p-value<br>(vs. WT<br>with same<br>stimulus)       | distance (Fig.<br>4C) | -                                                        | -                                      | < 0.0001                        |                                       |                 |                                        |
|                                                    | speed (Fig.<br>OIX C) | -                                                        | -                                      | < 0.0001                        |                                       |                 |                                        |
| Significance assessed by                           |                       | One-way ANOVA with Bonferroni multiple comparison        |                                        |                                 |                                       |                 |                                        |
| <b>Figure 4D/OIX D</b>                             |                       | WT<br>(control)                                          | <i>Cd84<sup>-/-</sup></i><br>(control) | WT (Ctr-<br>Fc)                 | <i>Cd84<sup>-/-</sup></i><br>(Ctr-Fc) | WT<br>(CD84-Fc) | <i>Cd84<sup>-/-</sup></i><br>(CD84-Fc) |
| n                                                  |                       | 60                                                       | 60                                     | 60                              | 60                                    | 60              | 60                                     |
| p-value<br>(vs.<br>control of<br>same<br>genotype) | distance (Fig.<br>4D) | -                                                        | -                                      | > 0.9999                        | > 0.9999                              | < 0.0001        | > 0.9999                               |
|                                                    | speed (Fig.<br>OIX D) | -                                                        | -                                      | > 0.9999                        | > 0.9999                              | < 0.0001        | > 0.9999                               |
| p-value<br>(vs. WT<br>with same<br>stimulus)       | distance (Fig.<br>4D) | -                                                        | > 0.9999                               | -                               | > 0.9999                              | -               | < 0.0001                               |
|                                                    | speed (Fig.<br>OIX D) | -                                                        | > 0.9999                               | -                               | > 0.9999                              | -               | < 0.0001                               |
| Significance assessed by                           |                       | Kruskal-Wallis test with Dunn's multiple comparison test |                                        |                                 |                                       |                 |                                        |

| <b>Figure 4E/OIX G</b>                     |                    | <i>WT</i> T cells stimulated with:                       |                                    |                          |                                          |                                               |                                           |                     |                                     |
|--------------------------------------------|--------------------|----------------------------------------------------------|------------------------------------|--------------------------|------------------------------------------|-----------------------------------------------|-------------------------------------------|---------------------|-------------------------------------|
|                                            |                    | <i>WT</i> PLT-R                                          | <i>Cd84<sup>-/-</sup></i> PLT-R    | <i>WT</i> PLT-R + Ctr-Fc | <i>Cd84<sup>-/-</sup></i> PLT-R + Ctr-Fc | <i>WT</i> PLT-R + CD84-Fc                     | <i>Cd84<sup>-/-</sup></i> PLT-R + CD84-Fc |                     |                                     |
| n                                          |                    | 60                                                       | 60                                 | 60                       | 60                                       | 60                                            | 60                                        |                     |                                     |
| p-value (vs. control of same genotype)     | distance (Fig. 4E) | -                                                        | -                                  | > 0.9999                 | > 0.9999                                 | > 0.9999                                      | < 0.0001                                  |                     |                                     |
|                                            | speed (Fig. OIX G) | -                                                        | -                                  | > 0.9999                 | > 0.9999                                 | > 0.9999                                      | < 0.0001                                  |                     |                                     |
| p-value (vs. <i>WT</i> with same stimulus) | distance (Fig. 4E) | -                                                        | < 0.0001                           | -                        | < 0.0001                                 | -                                             | > 0.9999                                  |                     |                                     |
|                                            | speed (Fig. OIX G) | -                                                        | < 0.0001                           | -                        | < 0.0001                                 | -                                             | > 0.9999                                  |                     |                                     |
| Significance assessed by                   |                    | Kruskal-Wallis test with Dunn's multiple comparison test |                                    |                          |                                          |                                               |                                           |                     |                                     |
| <b>Figure 4F/OIXH</b>                      |                    | Experiment on <i>WT</i> MBMEC                            |                                    |                          |                                          | Experiment on <i>Cd84<sup>-/-</sup></i> MBMEC |                                           |                     |                                     |
|                                            |                    | <i>WT</i> (Ctr-Fc)                                       | <i>Cd84<sup>-/-</sup></i> (Ctr-Fc) | <i>WT</i> (CD84-Fc)      | <i>Cd84<sup>-/-</sup></i> (CD84-Fc)      | <i>WT</i> (Ctr-Fc)                            | <i>Cd84<sup>-/-</sup></i> (Ctr-Fc)        | <i>WT</i> (CD84-Fc) | <i>Cd84<sup>-/-</sup></i> (CD84-Fc) |
| n                                          |                    | 60                                                       | 60                                 | 60                       | 60                                       | 60                                            | 60                                        | 60                  |                                     |
| p-value (vs. control of same genotype)     | distance (Fig. 4F) | -                                                        | -                                  | < 0.0001                 | > 0.9999                                 | -                                             | -                                         | < 0.0001            | > 0.9999                            |
|                                            | speed (Fig. OIX H) | -                                                        | -                                  | < 0.0001                 | > 0.9999                                 | -                                             | -                                         | < 0.0001            | > 0.9999                            |
| p-value (vs. <i>WT</i> with same stimulus) | distance (Fig. 4F) | -                                                        | 0.182                              | -                        | < 0.0001                                 | -                                             | > 0.9999                                  | -                   | < 0.0001                            |
|                                            | speed (Fig. OIX H) | -                                                        | > 0.9999                           | -                        | < 0.0001                                 | -                                             | > 0.9999                                  | -                   | < 0.0001                            |
| Significance assessed by                   |                    | Kruskal-Wallis test with Dunn's multiple comparison test |                                    |                          |                                          |                                               |                                           |                     |                                     |



| Figure OIXE/OIXF         |                                      | Distance (Figure OIXE)                                   |          |              |                                      | Speed (Figure OIXF)         |          |              |                                      |
|--------------------------|--------------------------------------|----------------------------------------------------------|----------|--------------|--------------------------------------|-----------------------------|----------|--------------|--------------------------------------|
|                          |                                      | WT T cells stimulated with:                              |          |              |                                      | WT T cells stimulated with: |          |              |                                      |
|                          |                                      | Ctr-Fc                                                   | CD84-Fc  | WT platelets | <i>Cd84</i> <sup>-/-</sup> platelets | Ctr-Fc                      | CD84-Fc  | WT platelets | <i>Cd84</i> <sup>-/-</sup> platelets |
| n                        |                                      | 43                                                       | 27       | 95           | 120                                  | 43                          | 27       | 95           | 120                                  |
| p-value compared to      | Ctr-Fc                               | -                                                        | 0.0098   | > 0.9999     | > 0.9999                             | -                           | 0.0089   | > 0.9999     | > 0.9999                             |
|                          | CD84-Fc                              | 0.0098                                                   | -        | < 0.0001     | 0.0106                               | 0.0089                      | -        | < 0.0001     | 0.0108                               |
|                          | WT platelets                         | > 0.9999                                                 | < 0.0001 | -            | 0.0835                               | > 0.9999                    | < 0.0001 | -            | 0.0108                               |
|                          | <i>Cd84</i> <sup>-/-</sup> platelets | > 0.9999                                                 | 0.0106   | 0.0835       | -                                    | > 0.9999                    | 0.0108   | 0.0108       | -                                    |
| Significance assessed by |                                      | Kruskal-Wallis test with Dunn's multiple comparison test |          |              |                                      |                             |          |              |                                      |
