# Supplementary material for: CD84 Links T Cell and Platelet Activity in Cerebral Thrombo-Inflammation in Acute Stroke
Source: PubMed Central journal article supplement — Circ Res. 2020 Jul 30;127(8):1023–35. doi: 10.1161/CIRCRESAHA.120.316655 (PMC7508294; doi:10.1161/circresaha.120.316655), 2020-07-30

# Full unedited gel for Supplemental Figure 5

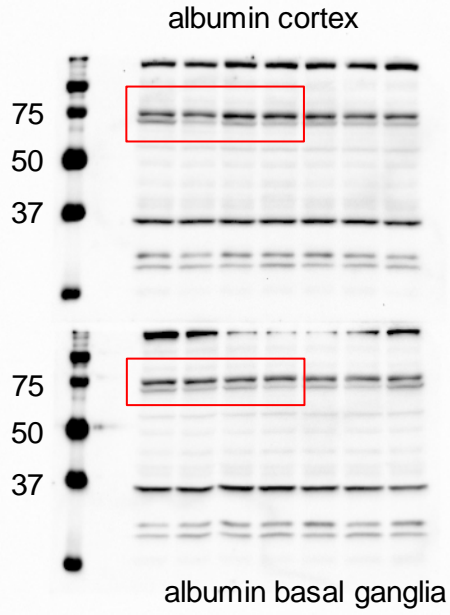

actin cortex

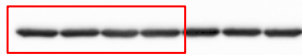

actin basal ganglia

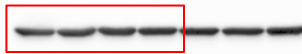

# Full unedited gel for Supplemental Figure 7

30 s exposure time

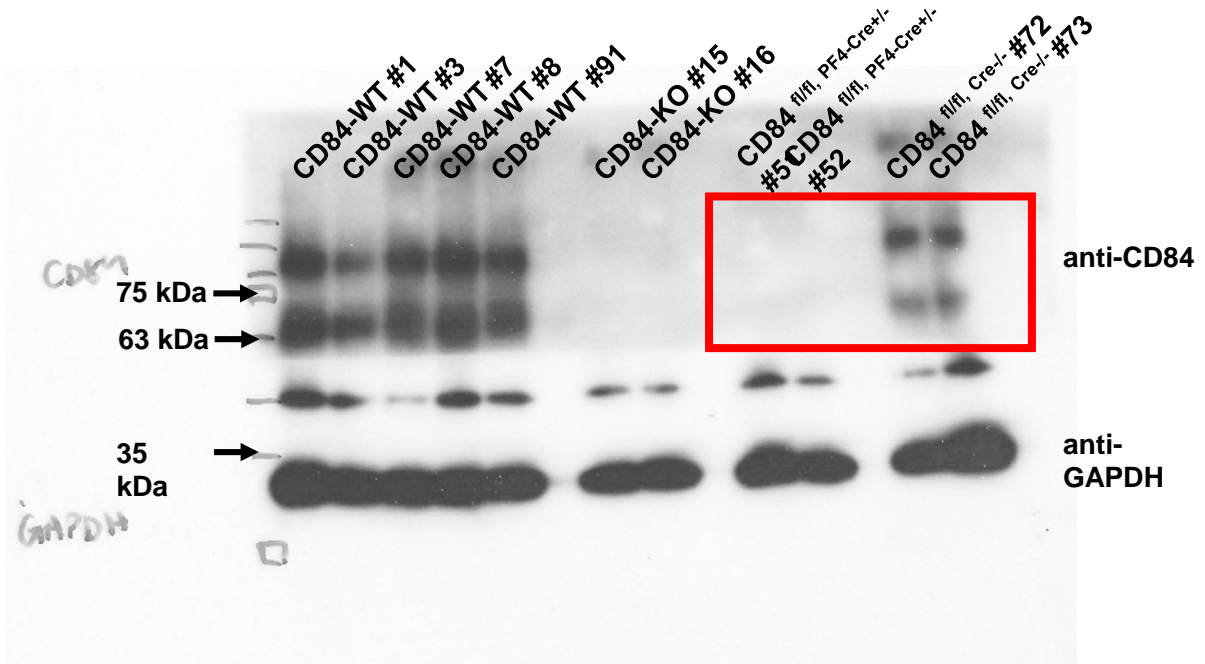

10 s exposure time

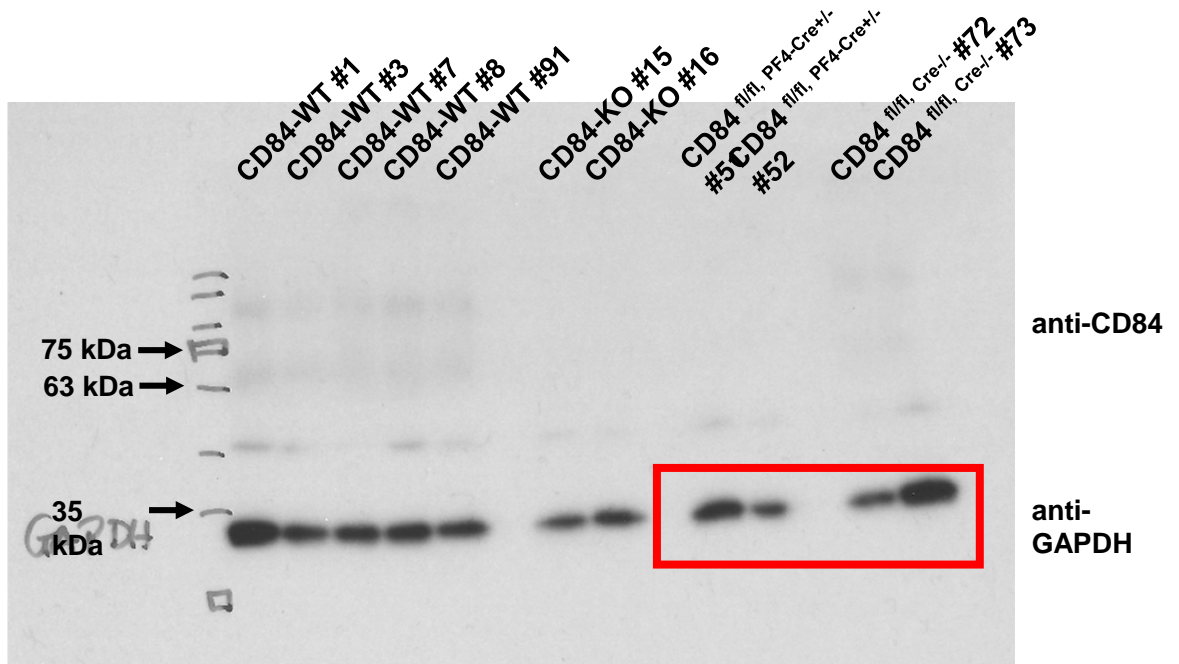

Supplement: res-127-1023-s003.pdf [file res-127-1023-s003.pdf]
