# Supplementary material for: CD84 Links T Cell and Platelet Activity in Cerebral Thrombo-Inflammation in Acute Stroke
Source: PubMed Central journal article supplement — Circ Res. 2020 Jul 30;127(8):1023–35. doi: 10.1161/CIRCRESAHA.120.316655 (PMC7508294; doi:10.1161/circresaha.120.316655), 2020-07-30
Supplement: res-127-1023-s004.pdf [file res-127-1023-s004.pdf]

## Major Resources Table

In order to allow validation and replication of experiments, all essential research materials listed in the Methods should be included in the Major Resources Table below. Authors are encouraged to use public repositories for protocols, data, code, and other materials and provide persistent identifiers and/or links to repositories when available. Authors may add or delete rows as needed.

### Animals (in vivo studies)

| Species                                                                  | Vendor or Source                      | Background Strain       | Sex | Persistent ID / URL                           |
|--------------------------------------------------------------------------|---------------------------------------|-------------------------|-----|-----------------------------------------------|
| <i>Cd84<sup>-/-</sup></i> mice ( <i>Cd84<sup>tm1BeNl</sup></i> )         | In house generated                    | C57Bl/6J                | F/M | MGI:5753066; Hofmann <i>et al.</i> , JTH 2012 |
| <i>Cd84<sup>fl/fl</sup></i> mice ( <i>Cd84<sup>tm1aBeNl</sup></i> )      | In house generated                    | C57Bl/6J                | F/M | This study                                    |
| Pf4-Cre mice (Tg(Pf4-icre)Q3Rsko)                                        | The Jackson Laboratory, bred in house | Backcrossed on C57Bl/6J | F/M | MGI:3764698; Jax-Stock:                       |
| <i>Rag1<sup>-/-</sup></i> mice (B6.129S7- <i>Rag1<sup>tm1Mom</sup></i> ) | The Jackson Laboratory, bred in house | Backcrossed on C57Bl/6J | F/M | MGI:3582299; Jax-Stock:                       |

### Antibodies

| Target antigen (anti-mouse if not indicated otherwise) | Vendor or Source | Catalog # | Working concentration | Lot # (preferred but not required) | Persistent ID / URL                                                                                                                                                                                                                                                                                                                                                                       |
|--------------------------------------------------------|------------------|-----------|-----------------------|------------------------------------|-------------------------------------------------------------------------------------------------------------------------------------------------------------------------------------------------------------------------------------------------------------------------------------------------------------------------------------------------------------------------------------------|
| AccuCount Fluorescent Particles                        | Spherotech       | ACFP 50-5 | 50 µl/Tube            | AL01                               | <a href="https://www.spherotech.com/AccuCount.htm">https://www.spherotech.com/AccuCount.htm</a>                                                                                                                                                                                                                                                                                           |
| Albumin                                                | Abcam            | ab106582  | 1:1000                |                                    | <a href="https://www.abcam.com/albumin-antibody-ab106582.html">https://www.abcam.com/albumin-antibody-ab106582.html</a>                                                                                                                                                                                                                                                                   |
| Albumin                                                | Abcam            | Ab207327  | 1:200                 |                                    | <a href="https://www.abcam.com/albumin-antibody-epr20195-ab207327.html">https://www.abcam.com/albumin-antibody-epr20195-ab207327.html</a>                                                                                                                                                                                                                                                 |
| CCR4                                                   | BioLegend        | 131203    | 1:300                 |                                    | <a href="https://www.biolegend.com/en-us/products/pe-anti-mouse-cd194-ccr4-antibody-5379">https://www.biolegend.com/en-us/products/pe-anti-mouse-cd194-ccr4-antibody-5379</a>                                                                                                                                                                                                             |
| CCR6                                                   | BD Biosciences   | 740441    | 1:200                 |                                    | <a href="https://www.bdbiosciences.com/ca/reagents/research/antibodies-buffers/immunology-reagents/anti-mouse-antibodies/cell-surface-antigens/bv650-rat-anti-mouse-cd196-ccr6-140706/p/740441">https://www.bdbiosciences.com/ca/reagents/research/antibodies-buffers/immunology-reagents/anti-mouse-antibodies/cell-surface-antigens/bv650-rat-anti-mouse-cd196-ccr6-140706/p/740441</a> |
| CD11b                                                  | Serotec          | MCA711    | 1:100                 |                                    | <a href="https://images.bio-rad-antibodies.com/datasheets/datasheet-MCA711.pdf">https://images.bio-rad-antibodies.com/datasheets/datasheet-MCA711.pdf</a>                                                                                                                                                                                                                                 |
| CD11b                                                  | BioLegend        | 101225    | 1:400                 |                                    | <a href="https://www.biolegend.com/en-us/products/apc-cyanine7-anti-mouse-human-cd11b-antibody-3930">https://www.biolegend.com/en-us/products/apc-cyanine7-anti-mouse-human-cd11b-antibody-3930</a>                                                                                                                                                                                       |
| CD19                                                   | BioLegend        | 115541    | 1:300                 |                                    | <a href="https://www.biolegend.com/en-us/products/brilliant-violet-650-anti-mouse-cd19-antibody-7851">https://www.biolegend.com/en-us/products/brilliant-violet-650-anti-mouse-cd19-antibody-7851</a>                                                                                                                                                                                     |

DOI [to be added]

|            |                          |              |                                                        |  |                                                                                                                                                                                                                                                                                                                                 |
|------------|--------------------------|--------------|--------------------------------------------------------|--|---------------------------------------------------------------------------------------------------------------------------------------------------------------------------------------------------------------------------------------------------------------------------------------------------------------------------------|
| CD3        | BioLegend                | 100301       | 1:150                                                  |  | <a href="https://www.biolegend.com/en-us/products/purified-anti-mouse-cd3epsilon-antibody-28">https://www.biolegend.com/en-us/products/purified-anti-mouse-cd3epsilon-antibody-28</a>                                                                                                                                           |
| CD31       | Bio-Rad                  | MCA2388      | 1:100                                                  |  | <a href="https://images.bio-rad-antibodies.com/datasheets/datasheet-MCA2388.pdf">https://images.bio-rad-antibodies.com/datasheets/datasheet-MCA2388.pdf</a>                                                                                                                                                                     |
| CD4        | BioLegend                | 100506       | 1:50                                                   |  | <a href="https://www.biolegend.com/en-us/products/purified-anti-mouse-cd4-antibody-484">https://www.biolegend.com/en-us/products/purified-anti-mouse-cd4-antibody-484</a>                                                                                                                                                       |
| CD4        | BioLegend                | 100547       | 1:300                                                  |  | <a href="https://www.biolegend.com/de-de/products/brilliant-violet-605-anti-mouse-cd4-antibody-7627">https://www.biolegend.com/de-de/products/brilliant-violet-605-anti-mouse-cd4-antibody-7627</a>                                                                                                                             |
| hCD42b     | Thermo Fisher Scientific | MA1-21426    | 1:20                                                   |  | <a href="https://www.thermofisher.com/antibody/product/CD42b-Antibody-clone-SZ2-Monoclonal/MA1-21426">https://www.thermofisher.com/antibody/product/CD42b-Antibody-clone-SZ2-Monoclonal/MA1-21426</a>                                                                                                                           |
| CD45       | BioLegend                | 103128       | 1:300                                                  |  | <a href="https://www.biolegend.com/en-us/products/alexa-fluor-700-anti-mouse-cd45-antibody-3407">https://www.biolegend.com/en-us/products/alexa-fluor-700-anti-mouse-cd45-antibody-3407</a>                                                                                                                                     |
| CD84       | In house generated       | Clone: JER1  | Saturating conditions for Flow cytometry, WB: 10 µg/ml |  | Hofmann <i>et al.</i> , JTH, 2012                                                                                                                                                                                                                                                                                               |
| hCD84      | BioLegend                | CD84.1.21    | 1:25                                                   |  | <a href="https://www.biolegend.com/en-us/products/pe-anti-human-cd84-antibody-3984">https://www.biolegend.com/en-us/products/pe-anti-human-cd84-antibody-3984</a>                                                                                                                                                               |
| CD8a       | BioLegend                | 100731       | 1:300                                                  |  | <a href="https://www.biolegend.com/en-us/products/percp-anti-mouse-cd8a-antibody-4256">https://www.biolegend.com/en-us/products/percp-anti-mouse-cd8a-antibody-4256</a>                                                                                                                                                         |
| CD9        | In house generated       | Clone: ULF1  | Saturating conditions                                  |  | Nieswandt <i>et al.</i> , Blood, 2000                                                                                                                                                                                                                                                                                           |
| CLEC-2     | In house generated       | Clone: INU1  | Saturating conditions                                  |  | May <i>et al.</i> , Blood, 2009                                                                                                                                                                                                                                                                                                 |
| CXCR3      | BD Biosciences           | 562266       | 1:200                                                  |  | <a href="https://wwwbdbiosciences.com/us/applications/research/t-cell-immunology/th-1-cells/surface-markers/mouse/apc-hamster-anti-mouse-cd183-cxcr3-173/p/562266">https://wwwbdbiosciences.com/us/applications/research/t-cell-immunology/th-1-cells/surface-markers/mouse/apc-hamster-anti-mouse-cd183-cxcr3-173/p/562266</a> |
| GAPDH      | Sigma-Aldrich            | G9545        | 1:1000                                                 |  | <a href="https://www.sigmaaldrich.com/catalog/product/sigma/g9545?lang=de&amp;region=DE&amp;gclid=EAlaIQobChMI6s764IjR6QIVRLTtCh1dEgqAEAAAYASAAEgIp1vD_BwE">https://www.sigmaaldrich.com/catalog/product/sigma/g9545?lang=de&amp;region=DE&amp;gclid=EAlaIQobChMI6s764IjR6QIVRLTtCh1dEgqAEAAAYASAAEgIp1vD_BwE</a>               |
| GPIbα      | In house generated       | Clone: p0p4  | Saturating conditions                                  |  | Bergmeier <i>et al.</i> , Blood, 2000                                                                                                                                                                                                                                                                                           |
| GPIIb/IIIa | In house generated       | Clone: JON/A | Saturating conditions                                  |  | Bergmeier <i>et al.</i> , Cytometry, 2002                                                                                                                                                                                                                                                                                       |
| GPIIb/IIIa | In house generated       | Clone: JON6  | Saturating conditions                                  |  | Nieswandt <i>et al.</i> , Blood, 2000                                                                                                                                                                                                                                                                                           |
| GPIX       | In house generated       | Clone: p0p6  | Saturating conditions                                  |  | Nieswandt <i>et al.</i> , Blood, 2000                                                                                                                                                                                                                                                                                           |
| GPV        | In house                 | Clone: DOM2  | Saturating                                             |  | Nieswandt <i>et al.</i> , Blood, 2000                                                                                                                                                                                                                                                                                           |

|                     |                          |                |                       |  |                                                                                                                                                                                                                                                                                                                 |
|---------------------|--------------------------|----------------|-----------------------|--|-----------------------------------------------------------------------------------------------------------------------------------------------------------------------------------------------------------------------------------------------------------------------------------------------------------------|
|                     | generated                |                | conditions            |  |                                                                                                                                                                                                                                                                                                                 |
| GPVI                | In house generated       | Clone: JAQ1    | Saturating conditions |  | Nieswandt <i>et al.</i> , J Biol Chem, 2000                                                                                                                                                                                                                                                                     |
| Integrin $\alpha$ 2 | In house generated       | Clone: LEN1    | Saturating conditions |  | Nieswandt <i>et al.</i> , J Biol Chem, 2000                                                                                                                                                                                                                                                                     |
| Integrin $\alpha$ 5 | In house generated       | Clone: BAR1    | Saturating conditions |  | Grüner <i>et al.</i> , Blood, 2003                                                                                                                                                                                                                                                                              |
| Integrin $\beta$ 3  | In house generated       | Clone: EDL1    | Saturating conditions |  | Nieswandt <i>et al.</i> , Blood, 2000                                                                                                                                                                                                                                                                           |
| LIVE/DEAD™ AQUA     | Thermo Fisher Scientific | L34965         | 1:500                 |  | <a href="https://www.thermofisher.com/order/catalog/product/L34965#/L34965">https://www.thermofisher.com/order/catalog/product/L34965#/L34965</a>                                                                                                                                                               |
| Ly-6B               | Bio-Rad                  | MCA771G        | 1:100                 |  | <a href="https://images.bio-rad-antibodies.com/datasheets/datasheet-MCA771G.pdf">https://images.bio-rad-antibodies.com/datasheets/datasheet-MCA771G.pdf</a>                                                                                                                                                     |
| Ly6G                | BioLegend                | 127605         | 1:300                 |  | <a href="https://www.biolegend.com/en-us/products/fitc-anti-mouse-ly-6g-antibody-4775">https://www.biolegend.com/en-us/products/fitc-anti-mouse-ly-6g-antibody-4775</a>                                                                                                                                         |
| Ly6G                | BioLegend                | 127609         | 1:400                 |  | <a href="https://www.biolegend.com/nl-nl/products/alexa-fluor-647-anti-mouse-ly-6g-antibody-4780">https://www.biolegend.com/nl-nl/products/alexa-fluor-647-anti-mouse-ly-6g-antibody-4780</a>                                                                                                                   |
| NeuN                | Merck                    | MAB377         | 1:500                 |  | <a href="https://www.merckmillipore.com/DE/de/product/Anti-NeuN-Antibody-clone-A60,MM_NF-MAB377">https://www.merckmillipore.com/DE/de/product/Anti-NeuN-Antibody-clone-A60,MM_NF-MAB377</a>                                                                                                                     |
| P-Selectin          | In house generated       | Clone: WUG 1.9 | Saturating conditions |  | Schulte <i>et al.</i> , Blood, 2003                                                                                                                                                                                                                                                                             |
| TUNEL               | Sigma-Aldrich            | 12156792910    | 1:10                  |  | <a href="https://www.sigmaaldrich.com/catalog/product/roche/12156792910?lang=de&amp;region=DE">https://www.sigmaaldrich.com/catalog/product/roche/12156792910?lang=de&amp;region=DE</a>                                                                                                                         |
| $\beta$ -actin      | Sigma-Aldrich            | A5441          | 1:250000              |  | <a href="https://www.sigmaaldrich.com/catalog/product/sigma/a5441?lang=de&amp;region=DE&amp;gclid=EAlaIqobChMIkZSh0PfG6QIVFomyCh0ksgoLEAAYASAAEgIli_D_BwE">https://www.sigmaaldrich.com/catalog/product/sigma/a5441?lang=de&amp;region=DE&amp;gclid=EAlaIqobChMIkZSh0PfG6QIVFomyCh0ksgoLEAAYASAAEgIli_D_BwE</a> |

### DNA/cDNA Clones

Not applicable

### Cultured Cells

| Name                                          | Vendor or Source   | Sex (F, M, or unknown) | Persistent ID / URL |
|-----------------------------------------------|--------------------|------------------------|---------------------|
| Primary brain microvascular endothelial cells | In house generated | M                      | n/a                 |

### Data & Code Availability

Not applicable

DOI [to be added]

**Other**

| <b>Description</b>                           | <b>Source / Repository</b> | <b>Persistent ID / URL</b>        |
|----------------------------------------------|----------------------------|-----------------------------------|
| CCL20                                        | Pepro Tech                 | 250-27                            |
| CD84 ELISA                                   | Merck                      | RAB1353-1KT                       |
| CD84-Fc                                      | in house generated         | this study                        |
| GPVI-Fc                                      | in house generated         | Grüner <i>et al.</i> , Blood 2005 |
| Human CD4+ T cell MACS Kit                   | Miltenyi Biotech           | 130-091-155                       |
| Ibidi Glass Bottom $\mu$ -Slides 8 well      | Ibidi                      | 80827                             |
| Ibidi $\mu$ -Slides VI0.4                    | Ibidi                      | 80606                             |
| <i>Il-1<math>\beta</math></i>                | Applied Biosystems         | Mm 00434228_m1                    |
| <i>Mmp2</i>                                  | Applied Biosystems         | Mm 00439498_m1                    |
| <i>Mmp9</i>                                  | Applied Biosystems         | Mm 00442991_m1                    |
| Mouse CD4+ T cell MACS Kit                   | Miltenyi Biotech           | 130-104-454                       |
| PMA                                          | Merck                      | P1585                             |
| Silicon rubber-coated 6.0 nylon monofilament | Docol                      | 6021PK10                          |
| <i>Tnfa</i>                                  | Applied Biosystems         | Mm 00443258_m1                    |
